# Supplementary material
Source: PubMed Central journal article supplement (PMC5657492)
Supplement: NIHMS913456-supplement-supplemental_Data.pdf [file NIHMS913456-supplement-supplemental_Data.pdf]

## Supplemental Figures

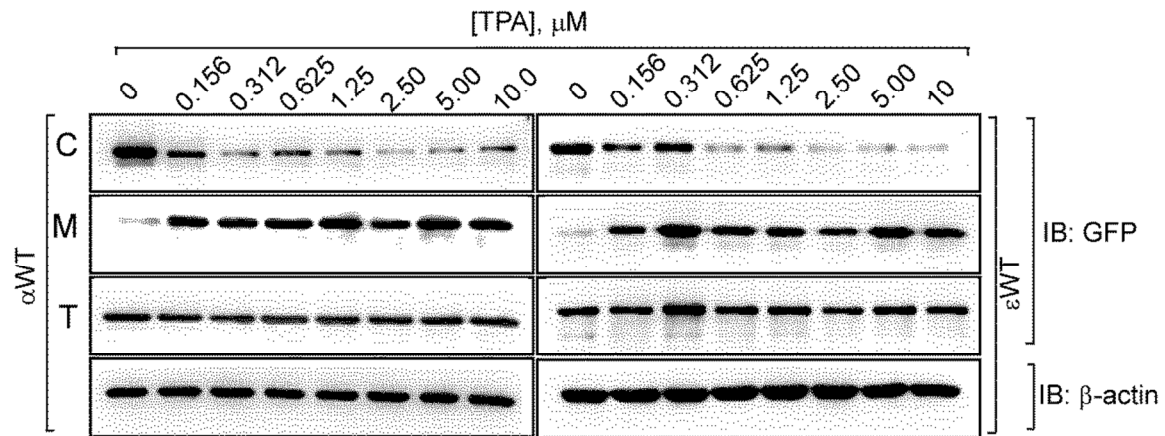

**Fig S1:** TPA-induced membrane translocation of PKC $\alpha$  ( $\alpha$ WT) and PKC $\epsilon$  ( $\epsilon$ WT). Western blot analysis of the cytosolic (C), membrane (M) fraction and total cell lysate (T) of  $\alpha$ WT (left panel) and  $\epsilon$ WT (right panel) after cells treated with 0-10  $\mu$ M of TPA for 1 h.  $\beta$ -Actin bands are shown as loading control.

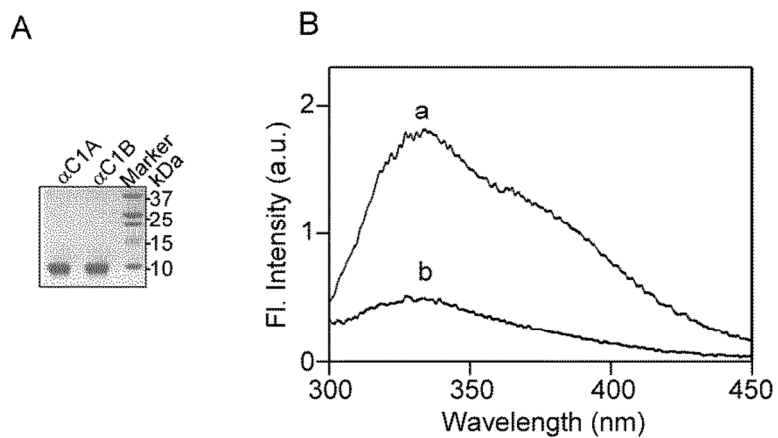

**Fig S2:** Characterization of purified  $\alpha$ C1A and  $\alpha$ C1B. **A)** SDS-PAGE (15%) of the purified protein. **A)** Fluorescence emission spectra of **a)**  $\alpha$ C1A and **b)**  $\alpha$ C1B. Proteins (1  $\mu$ M) in buffer (50 mM tris, 150 mM NaCl, pH 7.2) were excited at 290 nm.

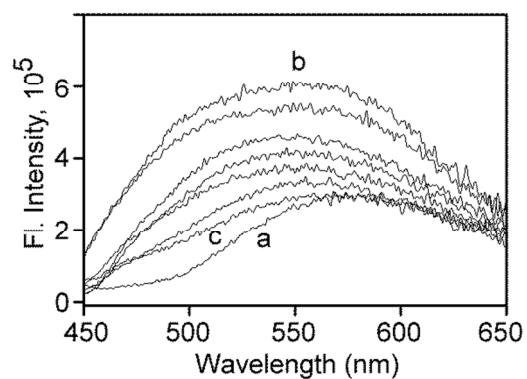

**Figure S3:** Emission spectra of curcumin (5  $\mu\text{M}$ ) (**a**) in the presence of  $\alpha\text{C1B}$  (5  $\mu\text{M}$ ) and varying concentration of phorbol 13-acetate. In the presence of  $\alpha\text{C1B}$  (**b**), curcumin's emission maximum is blue shifted and fluorescence intensity is increased. Concomitant addition of phorbol 13-acetate (1-10  $\mu\text{M}$ ) decreased fluorescence intensity (**c**) of curcumin. Buffer used was 50 mM Tris, 150 mM NaCl, pH 7.2 and excitation was at 425 nm.
